# Supplementary material for: Direct MALDI-TOF MS and Antimicrobial Susceptibility Testing of Positive Blood Cultures Using the FASTTM System and FAST-PBC Prep Cartridges—Performance Evaluation in a Clinical Microbiology Laboratory Serving High-Risk Patients
Source: MDPI journal article supplement (doi:10.3390/microorganisms10102076), 2022-10-20
Supplement: s1 [file s1]

**Table S3. Liquid Colony AST Errors compared to overnight culture with Vitek 2 AST**

| Species                      | Drug                              | LC Result<br>MIC/Interpretati<br>on | SOC Result<br>MIC/Interpretati<br>on | VM<br>E | ME | mE |
|------------------------------|-----------------------------------|-------------------------------------|--------------------------------------|---------|----|----|
| <b>Gram-negative AST</b>     |                                   |                                     |                                      |         |    |    |
| <i>Klebsiella pneumoniae</i> | Ampicillin/Sulbactam              | 4 (S)                               | 16 (I)                               |         |    | 1  |
| <i>Klebsiella oxytoca</i>    | Ampicillin/Sulbactam              | 16 (I)                              | >=32 [R]                             |         |    | 1  |
| <i>Klebsiella pneumoniae</i> | Ampicillin/Sulbactam              | 16 (I)                              | >=32 [R]                             |         |    | 1  |
| <i>Klebsiella pneumoniae</i> | Ciprofloxacin                     | 1 [R]                               | 0.5 (I)                              |         |    | 1  |
| <i>Klebsiella pneumoniae</i> | ESBL Screen                       | NEG                                 | POS                                  |         |    |    |
| <i>Klebsiella pneumoniae</i> | Ampicillin                        | 16 (I)                              | >=32 [R]                             |         |    | 1  |
| <i>Enterobacter cloacae</i>  | Ceftriaxone                       | ≤1 (S)                              | 4 (R)                                | 1       |    |    |
| <i>Klebsiella pneumoniae</i> | Ampicillin/Sulbactam              | 16 (I)                              | >=32 [R]                             |         |    | 1  |
| <i>Klebsiella aerogenes</i>  | Cefazolin                         | <=4 (I)                             | >=64 [R]                             |         |    | 1  |
| <i>Klebsiella aerogenes</i>  | Cefazolin                         | <=4 (I)                             | >=64 [R]                             |         |    | 1  |
| <i>E. coli</i>               | Cefoxitin                         | 16 (I)                              | <=4 (S)                              |         |    | 1  |
| <i>Klebsiella aerogenes</i>  | Cefazolin                         | <=4 (I)                             | >=64 [R]                             |         |    | 1  |
| <i>Klebsiella pneumoniae</i> | Ampicillin                        | 16 (I)                              | >=32 [R]                             |         |    | 1  |
|                              |                                   |                                     |                                      |         |    |    |
|                              |                                   |                                     |                                      |         |    |    |
| Species                      | Drug                              | LC Result                           | SOC result                           | VM<br>E | ME | mE |
| <b>Gram-positive AST</b>     |                                   |                                     |                                      |         |    |    |
| <i>S. hominis</i>            | Erythromycin                      | 1 (I)                               | <=0.25 (S)                           |         |    | 1  |
| <i>S. epidermidis</i>        | Clindamycin                       | 0.5 (S)                             | 2 (I)                                |         |    | 1  |
| <i>S. haemolyticus</i>       | Moxifloxacin                      | 1 (I)                               | 2 R                                  |         |    | 1  |
| <i>S. aureus (MSSA)</i>      | Penicillin                        | 0.06 (S)                            | 0.25 (R)                             | 1       |    |    |
| <i>E. faecium</i>            | Linezolid                         | 4 (I)                               | 2 (S)                                |         |    | 1  |
| <i>E. faecalis</i>           | Linezolid                         | 4 (I)                               | 2 (S)                                |         |    | 1  |
| <i>S. epidermidis</i>        | Clindamycin                       | 0.5 (S)                             | ≥8 (R)                               | 1       |    |    |
| <i>S. epidermidis</i>        | Ciprofloxacin                     | 2 (I)                               | 4 (R)                                |         |    | 1  |
| <i>S. epidermidis</i>        | Trimethoprim/Sulfameth<br>oxazole | 40 (S)                              | 160 (R)                              | 1       |    |    |
| <i>S. epidermidis</i>        | Erythromycin                      | 0.5 (S)                             | ≥8 (R)                               | 1       |    |    |
| <i>E. faecalis</i>           | Erythromycin                      | 4 (I)                               | >=8 [R]                              |         |    | 1  |
| <i>E. faecium</i>            | Tetracycline                      | >=16 [R]                            | 2 (S)                                |         | 1  |    |

Abbreviations:

LC = Liquid Colony

SOC = Standard of Care

VME = Very Major Error

ME = Major Error

mE = Minor Error
