# Supplementary material for: Direct MALDI-TOF MS and Antimicrobial Susceptibility Testing of Positive Blood Cultures Using the FASTTM System and FAST-PBC Prep Cartridges—Performance Evaluation in a Clinical Microbiology Laboratory Serving High-Risk Patients
Source: MDPI journal article supplement (doi:10.3390/microorganisms10102076), 2022-10-20
Supplement: s1 [file s1]

**Table S2: AST Evaluation of Antimicrobials by Organism Type**

| <b>Gram-negative</b>          | <b><i>Enterobacterales</i></b> | <b><i>Pseudomonas</i> spp.</b> |
|-------------------------------|--------------------------------|--------------------------------|
| Number of isolates            | 39                             | 6                              |
| Amikacin                      | x                              | x                              |
| Ampicillin*                   | x                              |                                |
| Ampicillin/Sulbactam*         | x                              |                                |
| Cefazolin                     | x                              |                                |
| Cefepime                      | x                              | x                              |
| Cefoxitin                     | x                              |                                |
| Ceftazidime                   | x                              | x                              |
| Ceftriaxone                   | x                              |                                |
| Ciprofloxacin                 | x                              | x                              |
| Ertapenem                     | x                              |                                |
| Gentamicin                    | x                              | x                              |
| Meropenem                     | x                              | x                              |
| Piperacillin/tazobactam       | x                              | x                              |
| Tobramycin                    | x                              | x                              |
| Trimethoprim/sulfamethoxazole | x                              | x                              |

\*intrinsically resistant organisms not tested

| <b>Gram-positive</b>          | <b>Staphylococci</b> | <b>Enterococci</b> |
|-------------------------------|----------------------|--------------------|
| Number of isolates            | 43                   | 12                 |
| Ampicillin                    |                      | x                  |
| Benzylopenicillin             | x                    | x                  |
| Ciprofloxacin                 | x                    | x                  |
| Clindamycin                   | x                    |                    |
| Erythromycin                  | x                    | x                  |
| Gentamicin                    | x                    |                    |
| Levofloxacin                  | x                    | x                  |
| Linezolid                     | x                    | x                  |
| Moxifloxacin                  | x                    |                    |
| Oxacillin                     | x                    |                    |
| Quinupristin/Dalfopristin     | x                    | x                  |
| Rifampicin                    | x                    |                    |
| Tetracycline                  | x                    | x                  |
| Tigecycline                   | x                    | x                  |
| Trimethoprim/sulfamethoxazole | x                    |                    |
| Vancomycin                    | x                    | x                  |
